# Supplementary material
Source: PubMed Central journal article supplement (PMC11389191)
Supplement: PBI-15-558-s001.pdf [file PBI-15-558-s001.pdf]

**Supplementary material for online publication only**

ggggacaagttgtacaaaaagcaggctac**GAATTC***GACTCTAATTGGATACCGAGGGGAATTTAT*  
*GGAACGTCAGTGGAGCATTTTTGACAAGAAATATTTGCTAGCTGATAGTGACCTTAGG*  
*CGACTTTTGAACGCGCAGAATTAATAAGTGTGTTTGGGAATATTCTGATCTG*  
**GCAAAGCACCAAAAAATTGGAATATTCTTGAATTAATAAGTGTGTTTGGG**  
**AATATTCTGATCTGGCAAAGCACCAAAAAATTGGAATATTCTTGAATTA**  
**AA**  
**TAAGTGTGTTTGGGAATATTCTGATCTGGCAAAGCACCAAAAAATTGGAAT**  
**ATTCTTACTAGTGGATCTTCGCAAGACCCTTCTCTATATAAGGAAGTTCATTTCA**  
*TTGGAGAGGACACGCTGAAGCTAGATCTGAATTC*taccagctttctgtacaaagtgtcccc

**Supplementary Figure 1.** Sequence and arrangement of the *3XM-EZ2* bidirectional enhancer element. In Italics is represented minimum prom NOS at 5' in opposite direction, and at the 3' extreme the minimum promoter -46S. In box, restriction sites EcoR1, Spe I and Bgl II. In bold enhancer *3XM-EZ2*. Underlined P1BS sites. Lowercase, attB1 and attB2 recombination sites.

**Supplementary Table 1.** GUS activity of pPLDZ2, EZ2, 1XM-EZ2, 2XM-EZ2 and 3XM-EZ2 constructions. p35S activity is shown as control. Values are the mean of 4 technical replicas, and sample 1 and 2 are biological replicas.

| Fluorometric GUS activity (pmolMU $\mu\text{g protein}^{-1}\text{min}^{-1}$ ) |          |          |          |          |          |          |          |          |
|-------------------------------------------------------------------------------|----------|----------|----------|----------|----------|----------|----------|----------|
|                                                                               | P+       |          |          |          | P-       |          |          |          |
|                                                                               | Sample 1 | S.D.     | Sample 2 | S.D.     | Sample 1 | S.D.     | Sample 2 | S.D.     |
| 1XM- EZ2                                                                      | 0.761588 | 0.669508 | 0.216231 | 0.139591 | 2.851689 | 0.22148  | 5.000746 | 0.313199 |
|                                                                               | 7.111759 | 0.491729 | 7.408529 | 0.195737 | 74.58814 | 1.433836 | 55.04474 | 1.028059 |
|                                                                               | 3.139167 | 0.503757 | 2.443618 | 0.217075 | 12.82799 | 0.46096  | 19.36092 | 0.162966 |
|                                                                               | 2.736759 | 0.175333 | 2.332354 | 0.078024 | 23.82182 | 0.410421 | 27.68158 | 0.537599 |
|                                                                               | 2.92366  | 0.101277 | 2.769014 | 0.141929 | 30.19803 | 0.410471 | 22.044   | 0.434776 |
|                                                                               | 3.320347 | 0.17992  | 3.457594 | 0.089528 | 37.23785 | 0.215508 | 33.83594 | 1.133751 |
|                                                                               | 0.32803  | 0.082044 | 0.413568 | 0.123985 | 6.435193 | 0.261342 | 22.47726 | 0.258271 |
|                                                                               | 0.278444 | 0.179231 | 0.308601 | 0.117462 | 10.64913 | 0.24391  | 19.93512 | 0.21791  |
| 2XM- EZ2                                                                      | 1.182432 | 0.127118 | 1.633277 | 0.073326 | 219.3495 | 7.19405  | 483.9448 | 11.81131 |
|                                                                               | 1.308304 | 0.227924 | 1.410749 | 0.351042 | 61.8855  | 1.217091 | 89.60626 | 1.78614  |
|                                                                               | 3.87342  | 0.081063 | 2.90757  | 0.076657 | 30.10402 | 1.524155 | 41.35794 | 1.181317 |
|                                                                               | 0.350915 | 0.165794 | 0.541627 | 0.175257 | 45.72655 | 1.777953 | 37.88143 | 0.362203 |
|                                                                               | 1.565769 | 0.164133 | 1.557702 | 0.033149 | 19.49729 | 1.015673 | 19.57494 | 0.41217  |
|                                                                               | 0.669409 | 0.08948  | 0.873321 | 0.074912 | 161.5434 | 6.279294 | 104.7025 | 0.470147 |
|                                                                               | 3.268854 | 0.180526 | 3.776691 | 0.376321 | 454.5778 | 17.47772 | 491.8583 | 4.997988 |
|                                                                               | 3.253596 | 1.367244 | 2.764815 | 0.133127 | 79.69795 | 2.427632 | 116.4422 | 0.449889 |
| 3XM- EZ2                                                                      | 5.193167 | 1.272191 | 5.504439 | 0.209246 | 649.2429 | 29.89489 | 870.1454 | 6.879983 |
|                                                                               | 10.74106 | 0.121102 | 13.70651 | 0.333787 | 100.928  | 3.627475 | 100.9858 | 0.801547 |
|                                                                               | 8.601242 | 0.535634 | 10.49874 | 0.957515 | 368.0705 | 10.72441 | 357      | 10.09174 |
|                                                                               | 5.622276 | 0.247783 | 6.982366 | 0.151365 | 191.8649 | 9.109379 | 376.4444 | 3.725105 |
|                                                                               | 21.98371 | 0.232756 | 24.63982 | 0.900851 | 875.2082 | 32.80588 | 821.7092 | 6.588164 |
|                                                                               | 7.334895 | 0.794009 | 13.02633 | 0.626562 | 399.5976 | 10.37932 | 389.3221 | 9.487666 |
|                                                                               | 19.53627 | 0.662655 | 21.43479 | 0.980045 | 551.6329 | 15.4069  | 794.2837 | 30.15096 |
|                                                                               | 13.13463 | 0.47073  | 9.962046 | 2.266597 | 32.19897 | 0.531601 | 50.58638 | 1.495739 |
| pPLDZ2                                                                        | 1.462186 | 0.083322 | 1.469969 | 0.149412 | 24.60793 | 0.628366 | 25.7016  | 0.714082 |
|                                                                               | 3.92806  | 0.229748 | 3.351064 | 0.283603 | 114.0147 | 3.78786  | 202.438  | 4.442757 |
|                                                                               | 0.576013 | 0.475411 | 0.521664 | 0.303709 | 26.52496 | 0.451341 | 23.3282  | 0.519141 |
|                                                                               | 0.431528 | 0.169295 | 0.608932 | 0.144082 | 36.37225 | 0.464872 | 30.9159  | 1.437448 |
|                                                                               | 0.458498 | 0.209858 | 0.31998  | 0.096757 | 84.442   | 0.891433 | 128.7803 | 4.020476 |
|                                                                               | 0.91507  | 1.301239 | 0.205563 | 0.093247 | 16.09178 | 0.287077 | 4.284456 | 0.221954 |
|                                                                               | 5.523173 | 0.532629 | 6.610982 | 0.051988 | 51.25624 | 0.949978 | 27.13489 | 1.344033 |
|                                                                               | 0.616469 | 0.152438 | 0.665171 | 0.083876 | 16.51836 | 1.431342 | 20.32291 | 0.881851 |
| EZ2                                                                           | 0.335205 | 0.271096 | 0.16807  | 0.089235 | 3.561674 | 0.349284 | 1.309996 | 0.121424 |
|                                                                               | 0.344837 | 0.074545 | 0.837766 | 0.790539 | 3.340675 | 0.286524 | 2.876853 | 0.939352 |
|                                                                               | 0.470057 | 0.167768 | 0.26762  | 0.06157  | 4.471366 | 0.177939 | 2.804932 | 0.226971 |
|                                                                               | 0.366028 | 0.202953 | 0.473183 | 0.453243 | 1.531571 | 0.263471 | 1.402466 | 0.286398 |
| min 35S                                                                       | 951.1493 | 16.15977 | 876.4949 | 11.57581 | 734.743  | 13.87392 | 714.2404 | 17.67162 |

**Supplementary Table 2.** Sequence of oligonucleotides used for synthesizing DNA fragments to generate the in-tandem enhancers and primers used for Real Time PCR and RT-PCR assays.

Oligonucleotides used to generate the in-tandem enhancers

| Name     | Sequence                                                                                                                                                       |
|----------|----------------------------------------------------------------------------------------------------------------------------------------------------------------|
| Primer A | 5' CCCAAGCTTGAATTAATAAGTGTGTTGGGAATATTCTGATCTGGCAAAGCACCAAAAAATTGG<br>AATATTCTTGAATTAATAAGTGTGTTGGGAATATTCTGATCTGGCAAAGCACCAAAAAATTGGAATATT<br>CTTAAGCTTCGC 3' |
| Primer B | 5' CCCAAGCTTGAATTAATAAGTGTGTTGGGAATATTCTGATCTGGCAAAGCACCAAAAA<br>TTGGAATATTCTTAAGCTTCGC 3'                                                                     |
| Reverse  | 5' GCGAAGCTTA 3'                                                                                                                                               |

Oligonucleotides used for Real Time and RT-PCR analysis

| Name      | Sequence                      |
|-----------|-------------------------------|
| Hyg fwd   | 5' GACTGGAGCGAGGCGATGTTTCG 3' |
| Hyg rev   | 5' ATTTGTGTACGCCCGACAGTCC 3'  |
| GUS fwd   | 5' TGCTGTCGGCTTTAACCTCT 3'    |
| GUS rev   | 5' GGCACAGCACATCAAAGAGA 3'    |
| ACTIN fwd | 5' GAATTGTCTCGTTGTCCTCCTC 3'  |
| ACTIN rev | 5' TGCAAATCCAGCCTTCACCATAC 3' |
